# Supplementary material for: Distribution of energy intake across the day and weight loss: A systematic review and meta‐analysis
Source: PubMed Central journal article supplement — Obes Rev. 2022 Dec 18;24(3):e13537. doi: 10.1111/obr.13537 (PMC10078448; doi:10.1111/obr.13537), 2022-12-18
Supplement: OBR-24-0-s001.pdf [file OBR-24-0-s001.pdf]

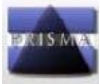

# PRISMA 2020 Checklist

| Section and Topic             | Item # | Checklist item                                                                                                                                                                                                                                                                                       | Location where item is reported |
|-------------------------------|--------|------------------------------------------------------------------------------------------------------------------------------------------------------------------------------------------------------------------------------------------------------------------------------------------------------|---------------------------------|
| <b>TITLE</b>                  |        |                                                                                                                                                                                                                                                                                                      |                                 |
| Title                         | 1      | Identify the report as a systematic review.                                                                                                                                                                                                                                                          | Page 1                          |
| <b>ABSTRACT</b>               |        |                                                                                                                                                                                                                                                                                                      |                                 |
| Abstract                      | 2      | See the PRISMA 2020 for Abstracts checklist.                                                                                                                                                                                                                                                         | Page 2                          |
| <b>INTRODUCTION</b>           |        |                                                                                                                                                                                                                                                                                                      |                                 |
| Rationale                     | 3      | Describe the rationale for the review in the context of existing knowledge.                                                                                                                                                                                                                          | Page 2                          |
| Objectives                    | 4      | Provide an explicit statement of the objective(s) or question(s) the review addresses.                                                                                                                                                                                                               | Page 3                          |
| <b>METHODS</b>                |        |                                                                                                                                                                                                                                                                                                      |                                 |
| Eligibility criteria          | 5      | Specify the inclusion and exclusion criteria for the review and how studies were grouped for the syntheses.                                                                                                                                                                                          | Methods section 2, page 3+4     |
| Information sources           | 6      | Specify all databases, registers, websites, organisations, reference lists and other sources searched or consulted to identify studies. Specify the date when each source was last searched or consulted.                                                                                            | Methods section 1, Page 3       |
| Search strategy               | 7      | Present the full search strategies for all databases, registers and websites, including any filters and limits used.                                                                                                                                                                                 | Supplementary material          |
| Selection process             | 8      | Specify the methods used to decide whether a study met the inclusion criteria of the review, including how many reviewers screened each record and each report retrieved, whether they worked independently, and if applicable, details of automation tools used in the process.                     | Methods section 1 + 3, page 3+4 |
| Data collection process       | 9      | Specify the methods used to collect data from reports, including how many reviewers collected data from each report, whether they worked independently, any processes for obtaining or confirming data from study investigators, and if applicable, details of automation tools used in the process. | Methods section 3, page 4       |
| Data items                    | 10a    | List and define all outcomes for which data were sought. Specify whether all results that were compatible with each outcome domain in each study were sought (e.g. for all measures, time points, analyses), and if not, the methods used to decide which results to collect.                        | Methods section 3, page 4       |
|                               | 10b    | List and define all other variables for which data were sought (e.g. participant and intervention characteristics, funding sources). Describe any assumptions made about any missing or unclear information.                                                                                         | Methods sections 3 + 5, page 4  |
| Study risk of bias assessment | 11     | Specify the methods used to assess risk of bias in the included studies, including details of the tool(s) used, how many reviewers assessed each study and whether they worked independently, and if applicable, details of automation tools used in the process.                                    | Methods section 4               |
| Effect measures               | 12     | Specify for each outcome the effect measure(s) (e.g. risk ratio, mean difference) used in the synthesis or presentation of results.                                                                                                                                                                  | Methods section 3               |
| Synthesis methods             | 13a    | Describe the processes used to decide which studies were eligible for each synthesis (e.g. tabulating the study intervention characteristics and comparing against the planned groups for each synthesis (item #5)).                                                                                 | Methods section 5               |
|                               | 13b    | Describe any methods required to prepare the data for presentation or synthesis, such as handling of missing summary statistics, or data conversions.                                                                                                                                                | Methods section 5, page 4       |
|                               | 13c    | Describe any methods used to tabulate or visually display results of individual studies and syntheses.                                                                                                                                                                                               | Methods section 3               |

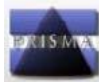

# PRISMA 2020 Checklist

| Section and Topic             | Item # | Checklist item                                                                                                                                                                                                                                                                       | Location where item is reported                                                         |
|-------------------------------|--------|--------------------------------------------------------------------------------------------------------------------------------------------------------------------------------------------------------------------------------------------------------------------------------------|-----------------------------------------------------------------------------------------|
|                               | 13d    | Describe any methods used to synthesize results and provide a rationale for the choice(s). If meta-analysis was performed, describe the model(s), method(s) to identify the presence and extent of statistical heterogeneity, and software package(s) used.                          | Methods section 5                                                                       |
|                               | 13e    | Describe any methods used to explore possible causes of heterogeneity among study results (e.g. subgroup analysis, meta-regression).                                                                                                                                                 | Methods section 5                                                                       |
|                               | 13f    | Describe any sensitivity analyses conducted to assess robustness of the synthesized results.                                                                                                                                                                                         | Methods section 5                                                                       |
| Reporting bias assessment     | 14     | Describe any methods used to assess risk of bias due to missing results in a synthesis (arising from reporting biases).                                                                                                                                                              | NA                                                                                      |
| Certainty assessment          | 15     | Describe any methods used to assess certainty (or confidence) in the body of evidence for an outcome.                                                                                                                                                                                | Methods section 5                                                                       |
| <b>RESULTS</b>                |        |                                                                                                                                                                                                                                                                                      |                                                                                         |
| Study selection               | 16a    | Describe the results of the search and selection process, from the number of records identified in the search to the number of studies included in the review, ideally using a flow diagram.                                                                                         | Figure 1                                                                                |
|                               | 16b    | Cite studies that might appear to meet the inclusion criteria, but which were excluded, and explain why they were excluded.                                                                                                                                                          | Table 3 supplementary material                                                          |
| Study characteristics         | 17     | Cite each included study and present its characteristics.                                                                                                                                                                                                                            | Table 1                                                                                 |
| Risk of bias in studies       | 18     | Present assessments of risk of bias for each included study.                                                                                                                                                                                                                         | Table 4 supplementary material                                                          |
| Results of individual studies | 19     | For all outcomes, present, for each study: (a) summary statistics for each group (where appropriate) and (b) an effect estimate and its precision (e.g. confidence/credible interval), ideally using structured tables or plots.                                                     | Table 2                                                                                 |
| Results of syntheses          | 20a    | For each synthesis, briefly summarise the characteristics and risk of bias among contributing studies.                                                                                                                                                                               | Results section pages 5 + 6                                                             |
|                               | 20b    | Present results of all statistical syntheses conducted. If meta-analysis was done, present for each the summary estimate and its precision (e.g. confidence/credible interval) and measures of statistical heterogeneity. If comparing groups, describe the direction of the effect. | Results section pages 6 + 7 with additional figures presented in supplementary material |
|                               | 20c    | Present results of all investigations of possible causes of heterogeneity among study results.                                                                                                                                                                                       | Results section and figures presented in supplementary material                         |



## PRISMA 2020 Checklist

| Section and Topic                              | Item # | Checklist item                                                                                                                                                                                                                             | Location where item is reported |
|------------------------------------------------|--------|--------------------------------------------------------------------------------------------------------------------------------------------------------------------------------------------------------------------------------------------|---------------------------------|
|                                                | 20d    | Present results of all sensitivity analyses conducted to assess the robustness of the synthesized results.                                                                                                                                 | Results section, Figure 2b      |
| Reporting biases                               | 21     | Present assessments of risk of bias due to missing results (arising from reporting biases) for each synthesis assessed.                                                                                                                    | NA                              |
| Certainty of evidence                          | 22     | Present assessments of certainty (or confidence) in the body of evidence for each outcome assessed.                                                                                                                                        | Results text and figures        |
| <b>DISCUSSION</b>                              |        |                                                                                                                                                                                                                                            |                                 |
| Discussion                                     | 23a    | Provide a general interpretation of the results in the context of other evidence.                                                                                                                                                          | Discussion section, page 6      |
|                                                | 23b    | Discuss any limitations of the evidence included in the review.                                                                                                                                                                            | Discussion section, page 7      |
|                                                | 23c    | Discuss any limitations of the review processes used.                                                                                                                                                                                      | Discussion section, page 7      |
|                                                | 23d    | Discuss implications of the results for practice, policy, and future research.                                                                                                                                                             | Discussion section page 7       |
| <b>OTHER INFORMATION</b>                       |        |                                                                                                                                                                                                                                            |                                 |
| Registration and protocol                      | 24a    | Provide registration information for the review, including register name and registration number, or state that the review was not registered.                                                                                             | Methods, section 1, page 3      |
|                                                | 24b    | Indicate where the review protocol can be accessed, or state that a protocol was not prepared.                                                                                                                                             | Methods section 1               |
|                                                | 24c    | Describe and explain any amendments to information provided at registration or in the protocol.                                                                                                                                            | NA                              |
| Support                                        | 25     | Describe sources of financial or non-financial support for the review, and the role of the funders or sponsors in the review.                                                                                                              | Title page                      |
| Competing interests                            | 26     | Declare any competing interests of review authors.                                                                                                                                                                                         | Title page                      |
| Availability of data, code and other materials | 27     | Report which of the following are publicly available and where they can be found: template data collection forms; data extracted from included studies; data used for all analyses; analytic code; any other materials used in the review. | NA                              |

Ovid MEDLINE(R) ALL <1946 to August 10, 2022>

1 exp Obesity/ 247730  
2 obes\$.tw. 350326  
3 exp Overweight/ 258607  
4 overweight.tw. 81385  
5 exp Weight Loss/ 47828  
6 (weight adj1 composition).tw. 266  
7 exp Body Composition/ 61983  
8 (body adj1 composition).tw. 41883  
9 exp Energy Metabolism/ 408618  
10 (energy adj1 metabolism).tw. 38648  
11 exp Body Mass Index/ 144659  
12 (body adj1 mass adj1 index).tw. 217628  
13 (weight adj3 reduc\$).tw. 40687  
14 adipos\$.tw. 123772  
15 exp Anthropometry/ 553164  
16 anthropometry.tw. 9864  
17 or/1-16 1470031  
18 chrononutrition.tw. 60  
19 chrono-nutrition.tw. 35  
20 ((meal\$ or food or eat\$ or nutrient\$) adj3 tim\$).tw. 9337  
21 ((break-fast or breakfast or break fast) adj3 tim\$).tw. 350  
22 ((lunch\$ or dinner\$ or supper\$) adj3 tim\$).tw. 516  
23 exp Circadian Rhythm/ 75671  
24 (circadian adj1 rhythm).tw. 16665  
25 exp Energy Intake/ 50355  
26 ((energy or calorie\$) adj1 intake).tw. 26436  
27 or/18-26 153248  
28 exp Controlled Clinical Trial/ 666278  
29 (random\$ adj3 trial\$).tw. 434388  
30 (control\$ adj1 clincial adj trial\$).tw. 1

31 interven\$.tw. 1253724  
32 or/28-31 1967232  
33 17 and 27 and 32 10110  
34 limit 33 to humans 9106  
35 limit 34 to "all adult (19 plus years)" 6349

APA PsycInfo <1806 to August Week 1 2022>

|    |                                                          |       |
|----|----------------------------------------------------------|-------|
| 1  | exp Obesity/                                             | 27326 |
| 2  | obes\$.tw.                                               | 45575 |
| 3  | exp Overweight/                                          | 28923 |
| 4  | overweight.tw.                                           | 16901 |
| 5  | exp Weight Loss/                                         | 4345  |
| 6  | (weight adj1 composition).tw.                            | 53    |
| 7  | exp Body Composition/                                    | 0     |
| 8  | (body adj1 composition).tw.                              | 2963  |
| 9  | exp Energy Metabolism/                                   | 0     |
| 10 | (energy adj1 metabolism).tw.                             | 1930  |
| 11 | exp Body Mass Index/                                     | 7269  |
| 12 | (body adj1 mass adj1 index).tw.                          | 23030 |
| 13 | (weight adj3 reduc\$.tw.                                 | 4200  |
| 14 | adipos\$.tw.                                             | 4275  |
| 15 | exp Anthropometry/                                       | 709   |
| 16 | anthropometry.tw.                                        | 1081  |
| 17 | or/1-16                                                  | 72105 |
| 18 | chrononutrition.tw.                                      | 13    |
| 19 | chrono-nutrition.tw.                                     | 7     |
| 20 | ((meal\$ or food or eat\$ or nutrient\$) adj3 tim\$).tw. | 2877  |
| 21 | ((break-fast or breakfast or break fast) adj3 tim\$).tw. | 77    |
| 22 | ((lunch\$ or dinner\$ or supper\$) adj3 tim\$).tw.       | 227   |
| 23 | exp Circadian Rhythm/                                    | 0     |
| 24 | (circadian adj1 rhythm).tw.                              | 4583  |
| 25 | exp Energy Intake/                                       | 0     |
| 26 | ((energy or calorie\$) adj1 intake).tw.                  | 3137  |
| 27 | or/18-26                                                 | 10675 |
| 28 | exp Controlled Clinical Trial/                           | 0     |
| 29 | (random\$ adj3 trial\$).tw.                              | 63857 |
| 30 | (control\$ adj1 clincial adj trial\$).tw.                | 0     |

31 interven\$.tw. 466325  
32 or/28-31 494944  
33 17 and 27 and 32 541  
34 limit 33 to humans 541  
35 limit 34 to "all adult (19 plus years)" 541  
36 limit 35 to last 2 years 87  
37 exp Obesity/ 27326  
38 obes\$.tw. 45575  
39 exp Overweight/ 28923  
40 overweight.tw. 16901  
41 exp Weight Loss/ 4345  
42 (weight adj1 composition).tw. 53  
43 exp Body Composition/ 0  
44 (body adj1 composition).tw. 2963  
45 exp Energy Metabolism/ 0  
46 (energy adj1 metabolism).tw. 1930  
47 exp Body Mass Index/ 7269  
48 (body adj1 mass adj1 index).tw. 23030  
49 (weight adj3 reduc\$).tw. 4200  
50 adipos\$.tw. 4275  
51 exp Anthropometry/ 709  
52 anthropometry.tw. 1081  
53 or/37-52 72105  
54 chrononutrition.tw. 13  
55 chrono-nutrition.tw. 7  
56 ((meal\$ or food or eat\$ or nutrient\$) adj3 tim\$).tw. 2877  
57 ((break-fast or breakfast or break fast) adj3 tim\$).tw. 77  
58 ((lunch\$ or dinner\$ or supper\$) adj3 tim\$).tw. 227  
59 exp Circadian Rhythm/ 0  
60 (circadian adj1 rhythm).tw. 4583  
61 exp Energy Intake/ 0  
62 ((energy or calorie\$) adj1 intake).tw. 3137

|    |                                          |        |  |
|----|------------------------------------------|--------|--|
| 63 | or/54-62                                 | 10675  |  |
| 64 | exp Controlled Clinical Trial/           | 0      |  |
| 65 | (random\$ adj3 trial\$.tw.               | 63857  |  |
| 66 | (control\$ adj1 clincial adj trial\$.tw. | 0      |  |
| 67 | interven\$.tw.                           | 466325 |  |
| 68 | or/64-67                                 | 494944 |  |
| 69 | 53 and 63 and 68                         | 541    |  |
| 70 | limit 69 to human                        | 518    |  |
| 71 | limit 70 to adulthood <18+ years>        | 319    |  |



Embase Classic+Embase <1947 to 2022 August 11>

|    |                                                                               |        |
|----|-------------------------------------------------------------------------------|--------|
| 1  | timing of food intake*.mp.                                                    | 208    |
| 2  | meal tim*.mp.                                                                 | 1888   |
| 3  | nutrient tim*.mp.                                                             | 51     |
| 4  | "timing of meal*".mp.                                                         | 225    |
| 5  | food tim*.mp.                                                                 | 165    |
| 6  | chrononutrition.mp.                                                           | 132    |
| 7  | eating time*.mp.                                                              | 398    |
| 8  | breakfast time*.mp.                                                           | 97     |
| 9  | lunch time*.mp.                                                               | 328    |
| 10 | dinner time*.mp.                                                              | 143    |
| 11 | supper time*.mp.                                                              | 15     |
| 12 | circadian rhythm/                                                             | 101017 |
| 13 | circadian rhythm.mp.                                                          | 106705 |
| 14 | calorie intake*.mp.                                                           | 4594   |
| 15 | energy intake*.mp.                                                            | 31875  |
| 16 | 1 or 2 or 3 or 4 or 5 or 6 or 7 or 8 or 9 or 10 or 11 or 12 or 13 or 14 or 15 | 144985 |
| 17 | body weight loss/                                                             | 68263  |
| 18 | weight loss*.mp.                                                              | 196851 |
| 19 | obesity/                                                                      | 506605 |
| 20 | overweight*.mp.                                                               | 126064 |
| 21 | obesity*.mp.                                                                  | 655414 |
| 22 | body composition/                                                             | 72086  |
| 23 | body composition*.mp.                                                         | 86103  |
| 24 | energy metabolism/                                                            | 71632  |
| 25 | energy metabolism*.mp.                                                        | 90824  |
| 26 | (body mass index or BMI).mp.                                                  | 534821 |
| 27 | weight reduction*.mp.                                                         | 157641 |
| 28 | adipos*.mp.                                                                   | 217966 |
| 29 | glucose blood level/                                                          | 315097 |
| 30 | blood glucose.tw.                                                             | 127228 |

31 ghrelin/17423  
32 ghrelin.mp. 19459  
33 waist circumference/ 64919  
34 waist circumference\*.mp. 72091  
35 anthropometry/ 66476  
36 anthropometry.mp. 71224  
37 17 or 18 or 19 or 20 or 21 or 22 or 23 or 24 or 25 or 26 or 27 or 28 or 29 or 30 or 31 or 32 or  
33 or 34 or 35 or 36 1704398  
38 16 and 37 33242  
39 limit 38 to human 25546  
40 limit 39 to (adult <18 to 64 years> or aged <65+ years>) 13593  
41 limit 40 to embase 8921

EBM Reviews - Cochrane Database of Systematic Reviews <2005 to August 12, 2022>

|    |                                                                              |     |      |
|----|------------------------------------------------------------------------------|-----|------|
| 1  | timing of food intake*.mp.                                                   | 2   |      |
| 2  | meal tim*.mp.                                                                | 25  |      |
| 3  | nutrient tim*.mp.                                                            | 0   |      |
| 4  | "timing of meal*".mp.                                                        | 6   |      |
| 5  | food tim*.mp.                                                                | 2   |      |
| 6  | chrononutrition.mp.                                                          | 0   |      |
| 7  | eating tim*.mp.                                                              | 1   |      |
| 8  | breakfast time*.mp.                                                          | 1   |      |
| 9  | lunch time*.mp.                                                              | 4   |      |
| 10 | dinner time*.mp.                                                             | 0   |      |
| 11 | supper time*.mp.                                                             | 0   |      |
| 12 | Circadian rhythm.mp. [mp=title, abstract, full text, keywords, caption text] |     | 53   |
| 13 | Calorie intake*.mp.                                                          | 59  |      |
| 14 | energy intake*.mp.                                                           | 169 |      |
| 15 | 1 or 2 or 3 or 4 or 5 or 6 or 7 or 8 or 9 or 10 or 11 or 12 or 13 or 14      |     | 271  |
| 16 | weight loss*.mp.                                                             | 810 |      |
| 17 | overweight*.mp.                                                              | 358 |      |
| 18 | obesity*.mp.                                                                 | 961 |      |
| 19 | body composition*.mp.                                                        | 153 |      |
| 20 | energy metabolism*.mp.                                                       | 46  |      |
| 21 | (body mass index or BMI).mp.                                                 | 979 |      |
| 22 | weight reduction*.mp.                                                        | 135 |      |
| 23 | adipos*.mp.                                                                  | 202 |      |
| 24 | blood glucose.tw.                                                            | 367 |      |
| 25 | ghrelin.mp.                                                                  | 16  |      |
| 26 | waist circumference*.mp.                                                     | 112 |      |
| 27 | anthropometry.mp.                                                            | 59  |      |
| 28 | 16 or 17 or 18 or 19 or 20 or 21 or 22 or 23 or 24 or 25 or 26 or 27         |     | 2321 |
| 29 | 15 and 28                                                                    | 198 |      |

Scopus search strategy 12/8/22

```
( ( TITLE-ABS-KEY ( "timing of food intake*" OR "meal tim*" OR "Nutrient tim*" OR "timing of meal*" OR "food tim*" OR chrononutrition OR "eating time*" OR "Breakfast time*" OR "Lunch time*" OR "Dinner time*" OR "supper time*" OR "Circadian Rhythm" OR "Circadian rhythm" ) ) OR ( TITLE-ABS-KEY ( "Calorie intake*" OR "Energy intake*" ) ) ) AND ( ( TITLE-ABS-KEY ( "Weight Loss" OR "weight loss*" OR overweight OR overweight* OR obesity OR obesity* OR "Body Composition" OR "body composition*" OR "Energy Metabolism" OR "energy metabolism*" ) ) OR ( TITLE-ABS-KEY ( "Body Mass Index" OR bmi OR "Weight reduction*" OR adipos* OR "Blood Glucose" OR ghrelin OR "Waist Circumference" OR "waist circumference*" OR anthropometry ) ) ) AND ( LIMIT-TO ( EXACTKEYWORD , "Human*" ) OR LIMIT-TO ( EXACTKEYWORD , "Humans" ) ) AND ( LIMIT-TO ( DOCTYPE , "ar" ) ) AND ( LIMIT-TO ( EXACTKEYWORD , "Adult" ) OR LIMIT-TO ( EXACTKEYWORD , "Middle Aged" ) OR LIMIT-TO ( EXACTKEYWORD , "Young Adult" ) OR LIMIT-TO ( EXACTKEYWORD , "Aged, 80 And Over" ) ) )
```

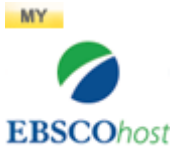

Monday, August 15, 2022 2:22:28 AM

| #   | Query                                                                                                                                           | Limiters/Expanders                                                                                                                                                                                  | Last Run Via                                                                                                 | Results |
|-----|-------------------------------------------------------------------------------------------------------------------------------------------------|-----------------------------------------------------------------------------------------------------------------------------------------------------------------------------------------------------|--------------------------------------------------------------------------------------------------------------|---------|
| S40 | S17 AND S39                                                                                                                                     | Limiters - Human; Age Groups: Adult: 19-44 years, Middle Aged: 45-64 years, Aged: 65+ years, Aged, 80 and over, All Adult<br>Expanders - Apply equivalent subjects<br>Search modes - Boolean/Phrase | Interface - EBSCOhost<br>Research Databases<br>Search Screen - Advanced Search<br>Database - CINAHL Complete | Display |
| S39 | S18 OR S19 OR S20 OR S21 OR S22 OR S23 OR S24 OR S25 OR S26 OR S27 OR S28 OR S29 OR S30 OR S31 OR S32 OR S33 OR S34 OR S35 OR S36 OR S37 OR S38 | Expanders - Apply equivalent subjects<br>Search modes - Boolean/Phrase                                                                                                                              | Interface - EBSCOhost<br>Research Databases<br>Search Screen - Advanced Search<br>Database - CINAHL Complete | Display |
| S38 | "anthropometry"                                                                                                                                 | Expanders - Apply equivalent subjects<br>Search modes - Boolean/Phrase                                                                                                                              | Interface - EBSCOhost<br>Research Databases<br>Search Screen - Advanced Search<br>Database - CINAHL Complete | Display |
| S37 | (MH "Anthropometry+")                                                                                                                           | Expanders - Apply equivalent subjects<br>Search modes - Boolean/Phrase                                                                                                                              | Interface - EBSCOhost<br>Research Databases<br>Search Screen - Advanced Search<br>Database - CINAHL Complete | Display |
| S36 | "waist circumference*"                                                                                                                          | Expanders - Apply equivalent subjects<br>Search modes - Boolean/Phrase                                                                                                                              | Interface - EBSCOhost<br>Research Databases<br>Search Screen - Advanced Search<br>Database - CINAHL Complete | Display |
| S35 | (MH "Waist Circumference")                                                                                                                      | Expanders - Apply equivalent subjects<br>Search modes - Boolean/Phrase                                                                                                                              | Interface - EBSCOhost<br>Research Databases<br>Search Screen - Advanced Search<br>Database - CINAHL Complete | Display |

|     |                          |                                                                              |                                                                                                                 |         |
|-----|--------------------------|------------------------------------------------------------------------------|-----------------------------------------------------------------------------------------------------------------|---------|
| S34 | "ghrelin"                | Expanders - Apply<br>equivalent subjects<br>Search modes -<br>Boolean/Phrase | Interface - EBSCOhost<br>Research Databases<br>Search Screen - Advanced<br>Search<br>Database - CINAHL Complete | Display |
| S33 | (MH "Ghrelin")           | Expanders - Apply<br>equivalent subjects<br>Search modes -<br>Boolean/Phrase | Interface - EBSCOhost<br>Research Databases<br>Search Screen - Advanced<br>Search<br>Database - CINAHL Complete | Display |
| S32 | "blood glucose"          | Expanders - Apply<br>equivalent subjects<br>Search modes -<br>Boolean/Phrase | Interface - EBSCOhost<br>Research Databases<br>Search Screen - Advanced<br>Search<br>Database - CINAHL Complete | Display |
| S31 | (MH "Blood Glucose")     | Expanders - Apply<br>equivalent subjects<br>Search modes -<br>Boolean/Phrase | Interface - EBSCOhost<br>Research Databases<br>Search Screen - Advanced<br>Search<br>Database - CINAHL Complete | Display |
| S30 | "adipos**"               | Expanders - Apply<br>equivalent subjects<br>Search modes -<br>Boolean/Phrase | Interface - EBSCOhost<br>Research Databases<br>Search Screen - Advanced<br>Search<br>Database - CINAHL Complete | Display |
| S29 | "weight reduction"       | Expanders - Apply<br>equivalent subjects<br>Search modes -<br>Boolean/Phrase | Interface - EBSCOhost<br>Research Databases<br>Search Screen - Advanced<br>Search<br>Database - CINAHL Complete | Display |
| S28 | "body mass index or bmi" | Expanders - Apply<br>equivalent subjects<br>Search modes -<br>Boolean/Phrase | Interface - EBSCOhost<br>Research Databases<br>Search Screen - Advanced<br>Search<br>Database - CINAHL Complete | Display |
| S27 | (MH "Body Mass Index")   | Expanders - Apply<br>equivalent subjects<br>Search modes -<br>Boolean/Phrase | Interface - EBSCOhost<br>Research Databases<br>Search Screen - Advanced<br>Search<br>Database - CINAHL Complete | Display |
| S26 | "energy metabolism**"    | Expanders - Apply<br>equivalent subjects                                     | Interface - EBSCOhost<br>Research Databases<br>Search Screen - Advanced                                         | Display |

|     |                              |                                                                              |                                                                                                                 |         |
|-----|------------------------------|------------------------------------------------------------------------------|-----------------------------------------------------------------------------------------------------------------|---------|
|     |                              | Search modes -<br>Boolean/Phrase                                             | Search<br>Database - CINAHL Complete                                                                            |         |
| S25 | (MH "Energy<br>Metabolism+") | Expanders - Apply<br>equivalent subjects<br>Search modes -<br>Boolean/Phrase | Interface - EBSCOhost<br>Research Databases<br>Search Screen - Advanced<br>Search<br>Database - CINAHL Complete | Display |
| S24 | "body composition**"         | Expanders - Apply<br>equivalent subjects<br>Search modes -<br>Boolean/Phrase | Interface - EBSCOhost<br>Research Databases<br>Search Screen - Advanced<br>Search<br>Database - CINAHL Complete | Display |
| S23 | (MH "Body<br>Composition+")  | Expanders - Apply<br>equivalent subjects<br>Search modes -<br>Boolean/Phrase | Interface - EBSCOhost<br>Research Databases<br>Search Screen - Advanced<br>Search<br>Database - CINAHL Complete | Display |
| S22 | "obesity**"                  | Expanders - Apply<br>equivalent subjects<br>Search modes -<br>Boolean/Phrase | Interface - EBSCOhost<br>Research Databases<br>Search Screen - Advanced<br>Search<br>Database - CINAHL Complete | Display |
| S21 | (MH "Obesity+")              | Expanders - Apply<br>equivalent subjects<br>Search modes -<br>Boolean/Phrase | Interface - EBSCOhost<br>Research Databases<br>Search Screen - Advanced<br>Search<br>Database - CINAHL Complete | Display |
| S20 | "overweight"                 | Expanders - Apply<br>equivalent subjects<br>Search modes -<br>Boolean/Phrase | Interface - EBSCOhost<br>Research Databases<br>Search Screen - Advanced<br>Search<br>Database - CINAHL Complete | Display |
| S19 | "weight loss**"              | Expanders - Apply<br>equivalent subjects<br>Search modes -<br>Boolean/Phrase | Interface - EBSCOhost<br>Research Databases<br>Search Screen - Advanced<br>Search<br>Database - CINAHL Complete | Display |
| S18 | (MH "Weight Loss+")          | Expanders - Apply<br>equivalent subjects<br>Search modes -<br>Boolean/Phrase | Interface - EBSCOhost<br>Research Databases<br>Search Screen - Advanced<br>Search<br>Database - CINAHL Complete | Display |

|     |                                                                                                                 |                                                                              |                                                                                                                 |         |
|-----|-----------------------------------------------------------------------------------------------------------------|------------------------------------------------------------------------------|-----------------------------------------------------------------------------------------------------------------|---------|
| S17 | S1 OR S2 OR S3 OR S4<br>OR S5 OR S6 OR S7 OR<br>S8 OR S9 OR S10 OR<br>S11 OR S12 OR S13 OR<br>S14 OR S15 OR S16 | Expanders - Apply<br>equivalent subjects<br>Search modes -<br>Boolean/Phrase | Interface - EBSCOhost<br>Research Databases<br>Search Screen - Advanced<br>Search<br>Database - CINAHL Complete | Display |
| S16 | "energy intake**"                                                                                               | Expanders - Apply<br>equivalent subjects<br>Search modes -<br>Boolean/Phrase | Interface - EBSCOhost<br>Research Databases<br>Search Screen - Advanced<br>Search<br>Database - CINAHL Complete | Display |
| S15 | (MH "Energy Intake")                                                                                            | Expanders - Apply<br>equivalent subjects<br>Search modes -<br>Boolean/Phrase | Interface - EBSCOhost<br>Research Databases<br>Search Screen - Advanced<br>Search<br>Database - CINAHL Complete | Display |
| S14 | "calorie intake**"                                                                                              | Expanders - Apply<br>equivalent subjects<br>Search modes -<br>Boolean/Phrase | Interface - EBSCOhost<br>Research Databases<br>Search Screen - Advanced<br>Search<br>Database - CINAHL Complete | Display |
| S13 | "circadian rhythm**"                                                                                            | Expanders - Apply<br>equivalent subjects<br>Search modes -<br>Boolean/Phrase | Interface - EBSCOhost<br>Research Databases<br>Search Screen - Advanced<br>Search<br>Database - CINAHL Complete | Display |
| S12 | (MH "Circadian Rhythm")                                                                                         | Expanders - Apply<br>equivalent subjects<br>Search modes -<br>Boolean/Phrase | Interface - EBSCOhost<br>Research Databases<br>Search Screen - Advanced<br>Search<br>Database - CINAHL Complete | Display |
| S11 | "supper time**"                                                                                                 | Expanders - Apply<br>equivalent subjects<br>Search modes -<br>Boolean/Phrase | Interface - EBSCOhost<br>Research Databases<br>Search Screen - Advanced<br>Search<br>Database - CINAHL Complete | Display |
| S10 | "dinner time**"                                                                                                 | Expanders - Apply<br>equivalent subjects<br>Search modes -<br>Boolean/Phrase | Interface - EBSCOhost<br>Research Databases<br>Search Screen - Advanced<br>Search<br>Database - CINAHL Complete | Display |
| S9  | "lunch time**"                                                                                                  | Expanders - Apply<br>equivalent subjects                                     | Interface - EBSCOhost<br>Research Databases<br>Search Screen - Advanced                                         | Display |



|    |                         |                                                                              |                                                                                                                 |         |
|----|-------------------------|------------------------------------------------------------------------------|-----------------------------------------------------------------------------------------------------------------|---------|
|    |                         | Search modes -<br>Boolean/Phrase                                             | Search<br>Database - CINAHL Complete                                                                            |         |
| S8 | "breakfast time**"      | Expanders - Apply<br>equivalent subjects<br>Search modes -<br>Boolean/Phrase | Interface - EBSCOhost<br>Research Databases<br>Search Screen - Advanced<br>Search<br>Database - CINAHL Complete | Display |
| S7 | "eating time**"         | Expanders - Apply<br>equivalent subjects<br>Search modes -<br>Boolean/Phrase | Interface - EBSCOhost<br>Research Databases<br>Search Screen - Advanced<br>Search<br>Database - CINAHL Complete | Display |
| S6 | "chrononutrition"       | Expanders - Apply<br>equivalent subjects<br>Search modes -<br>Boolean/Phrase | Interface - EBSCOhost<br>Research Databases<br>Search Screen - Advanced<br>Search<br>Database - CINAHL Complete | Display |
| S5 | "food tim**"            | Expanders - Apply<br>equivalent subjects<br>Search modes -<br>Boolean/Phrase | Interface - EBSCOhost<br>Research Databases<br>Search Screen - Advanced<br>Search<br>Database - CINAHL Complete | Display |
| S4 | "timing of meal**"      | Expanders - Apply<br>equivalent subjects<br>Search modes -<br>Boolean/Phrase | Interface - EBSCOhost<br>Research Databases<br>Search Screen - Advanced<br>Search<br>Database - CINAHL Complete | Display |
| S3 | "nutrient tim**"        | Expanders - Apply<br>equivalent subjects<br>Search modes -<br>Boolean/Phrase | Interface - EBSCOhost<br>Research Databases<br>Search Screen - Advanced<br>Search<br>Database - CINAHL Complete | Display |
| S2 | "meal tim**"            | Expanders - Apply<br>equivalent subjects<br>Search modes -<br>Boolean/Phrase | Interface - EBSCOhost<br>Research Databases<br>Search Screen - Advanced<br>Search<br>Database - CINAHL Complete | Display |
| S1 | "timing of food intake" | Expanders - Apply<br>equivalent subjects<br>Search modes -<br>Boolean/Phrase | Interface - EBSCOhost<br>Research Databases<br>Search Screen - Advanced<br>Search<br>Database - CINAHL Complete | Display |

| Full text screening                                                                                                                                                |                                                                                                                                                                                                                                                                                                                                                                   |                                                                                     |
|--------------------------------------------------------------------------------------------------------------------------------------------------------------------|-------------------------------------------------------------------------------------------------------------------------------------------------------------------------------------------------------------------------------------------------------------------------------------------------------------------------------------------------------------------|-------------------------------------------------------------------------------------|
| Title                                                                                                                                                              | Citation                                                                                                                                                                                                                                                                                                                                                          | Reason for exclusion                                                                |
| Circadian timing of food intake is associated with cardiometabolic risk in us hispanics/latinos: Results from the hispanic community health study/study of latinos | Makarem N, Aggarwal B, Sears DD, St-Onge MP, Castañeda SF, Talavera GA, Marinac CR, Patterson R, Sotres-Alvarez D, Garcia ML, Gallo LC. Circadian timing of food intake is associated with cardiometabolic risk in US Hispanics/Latinos: results from the Hispanic community health study/study of Latinos. <i>Circulation</i> . 2018 Nov 6;138(Suppl_1):A11503-. | Wrong study design - Cross-sectional                                                |
| The influence of portion size and timing of meals on weight balance and obesity                                                                                    | Berg C, Forslund HB. The influence of portion size and timing of meals on weight balance and obesity. <i>Current obesity reports</i> . 2015 Mar;4(1):11-8.                                                                                                                                                                                                        | Wrong study design - Cross-sectional                                                |
| Caloric and macronutrient intake differ with circadian phase and between lean and overweight young adults                                                          | McHill AW, Czeisler CA, Phillips AJ, Keating L, Barger LK, Garaulet M, Scheer FA, Klerman EB. Caloric and macronutrient intake differ with circadian phase and between lean and overweight young adults. <i>Nutrients</i> . 2019 Mar 11;11(3):587.                                                                                                                | Wrong study design - Cross-sectional                                                |
| New perspectives on chrononutrition                                                                                                                                | Aparecida Crispim C, Carliana Mota M. New perspectives on chrononutrition. <i>Biological Rhythm Research</i> . 2019 Jan 2;50(1):63-77.                                                                                                                                                                                                                            | Wrong study design - Narrative review                                               |
| Metabolic impacts of altering meal frequency and timing—does when we eat matter?                                                                                   | Hutchison AT, Heilbronn LK. Metabolic impacts of altering meal frequency and timing—does when we eat matter?. <i>Biochimie</i> . 2016 May 1;124:187-97.                                                                                                                                                                                                           | Wrong study design - Review                                                         |
| Meal timing regulates the human circadian system                                                                                                                   | Wehrens SM, Christou S, Isherwood C, Middleton B, Gibbs MA, Archer SN, Skene DJ, Johnston JD. Meal                                                                                                                                                                                                                                                                | Wrong outcomes - Short duration study exploring metabolic and genetic outcomes only |

|                                                                                                                                       |                                                                                                                                                                                                                                                                                                         |                                                                                                          |
|---------------------------------------------------------------------------------------------------------------------------------------|---------------------------------------------------------------------------------------------------------------------------------------------------------------------------------------------------------------------------------------------------------------------------------------------------------|----------------------------------------------------------------------------------------------------------|
|                                                                                                                                       | timing regulates the human circadian system. <i>Current Biology</i> . 2017 Jun 19;27(12):1768-75.                                                                                                                                                                                                       |                                                                                                          |
| Meal timing affects glucose tolerance, substrate oxidation and circadian-related variables: A randomized, crossover trial             | Bandin C, Scheer FA, Luque AJ, Avila-Gandia V, Zamora S, Madrid JA, Gómez-Abellán P, Garaulet M. Meal timing affects glucose tolerance, substrate oxidation and circadian-related variables: A randomized, crossover trial. <i>International journal of obesity</i> . 2015 May;39(5):828-33.            | Wrong outcomes - Short duration study with no anthropometric measurements                                |
| Effects of circadian restricted feeding on parameters of metabolic syndrome among healthy subjects                                    | Singh RB, Cornelissen G, Mojto V, Fatima G, Wichansawakun S, Singh M, Kartikey K, Sharma JP, Torshin VI, Chibisov S, Kharlitskaya E. Effects of circadian restricted feeding on parameters of metabolic syndrome among healthy subjects. <i>Chronobiology international</i> . 2020 Mar 3;37(3):395-402. | Wrong intervention - Intervention involves period of fasting and time-restricted feeding                 |
| Timing of food intake is associated with weight loss evolution in severe obese patients after bariatric surgery                       | Ruiz-Lozano T, Vidal J, De Hollanda A, Scheer FA, Garaulet M, Izquierdo-Pulido M. Timing of food intake is associated with weight loss evolution in severe obese patients after bariatric surgery. <i>Clinical nutrition</i> . 2016 Dec 1;35(6):1308-14.                                                | Wrong patient population - Study population did not meet inclusion criteria (bariatric surgery patients) |
| Sleep and meal timing influence food intake and its hormonal regulation in healthy adults with overweight/obesity                     | St-Onge MP, Pizinger T, Kovtun K, RoyChoudhury A. Sleep and meal timing influence food intake and its hormonal regulation in healthy adults with overweight/obesity. <i>European journal of clinical nutrition</i> . 2019 Jul;72(1):76-82.                                                              | Wrong outcomes - Anthropometric measurements were not included                                           |
| Postprandial metabolism and appetite do not differ between lean adults that eat breakfast or morning fast for 6 weeks                 | Chowdhury EA, Richardson JD, Tsintzas K, Thompson D, Betts JA. Postprandial metabolism and appetite do not differ between lean adults that eat breakfast or morning fast for 6 weeks. <i>The Journal of nutrition</i> . 2018 Jan 1;148(1):13-21.                                                        | Wrong outcomes - Study intervention included a period of fasting in the morning                          |
| Increased meal frequency attenuates fat-free mass losses and some markers of health status with a portion-controlled weight loss diet | Alencar MK, Beam JR, McCormick JJ, White AC, Salgado RM, Kravitz LR, Mermier CM, Gibson AL, Conn CA, Kolkmeier D, Ferraro RT. Increased meal                                                                                                                                                            | Wrong intervention – study duration not long enough to warrant meaningful weight loss                    |

|                                                                                                                                                                                                                                         |                                                                                                                                                                                                                                                                                                                                                                                                                           |                                      |
|-----------------------------------------------------------------------------------------------------------------------------------------------------------------------------------------------------------------------------------------|---------------------------------------------------------------------------------------------------------------------------------------------------------------------------------------------------------------------------------------------------------------------------------------------------------------------------------------------------------------------------------------------------------------------------|--------------------------------------|
|                                                                                                                                                                                                                                         | frequency attenuates fat-free mass losses and some markers of health status with a portion-controlled weight loss diet. Nutrition research. 2015 May 1;35(5):375-83.                                                                                                                                                                                                                                                      |                                      |
| Timing of food intake: Sounding the alarm about metabolic impairments? A systematic review                                                                                                                                              | Beccuti G, Monagheddu C, Evangelista A, Ciccone G, Broglio F, Soldati L, Bo S. Timing of food intake: Sounding the alarm about metabolic impairments? A systematic review. Pharmacological research. 2017 Nov 1;125:132-41.                                                                                                                                                                                               | Wrong study design – review          |
| Frequency and circadian timing of eating may influence metabolic risk of breast cancer                                                                                                                                                  | Marinac CR, Sears DD, Natarajan L, Gallo LC, Breen CI, Patterson RE. Frequency and circadian timing of eating may influence biomarkers of inflammation and insulin resistance associated with breast cancer risk. PloS one. 2015 Aug 25;10(8):e0136240.                                                                                                                                                                   | Wrong study design – cross sectional |
| Chrono-nutrition: a review of current evidence from observational studies on global trends in time-of-day of energy intake and its association with obesity                                                                             | Almoosawi S, Vingeliene S, Karagounis LG, Pot GK. Chrono-nutrition: a review of current evidence from observational studies on global trends in time-of-day of energy intake and its association with obesity. Proceedings of the Nutrition Society. 2016 Nov;75(4):487-500.                                                                                                                                              | Wrong study design – review          |
| Differences in meal patterns and timing with regard to central obesity in the ANIBES ('Anthropometric data, macronutrients and micronutrients intake, practice of physical activity, socioeconomic data and lifestyles in Spain') Study | Aparicio A, Rodríguez-Rodríguez EE, Aranceta-Bartrina J, Gil Á, González-Gross M, Serra-Majem L, Varela-Moreiras G, Ortega RM. Differences in meal patterns and timing with regard to central obesity in the ANIBES ('Anthropometric data, macronutrients and micronutrients intake, practice of physical activity, socioeconomic data and lifestyles in Spain') Study. Public health nutrition. 2017 Sep;20(13):2364-73. | Wrong study design – Cross sectional |
| The association among chronotype, timing of food intake and food preferences depends on body mass status                                                                                                                                | Munoz JS, Cañavate R, Hernandez CM, Cara-Salmerón V, Morante JJ. The association among chronotype, timing of food intake and food                                                                                                                                                                                                                                                                                         | Wrong study design – cross sectional |

|                                                                                                                                                                       |                                                                                                                                                                                                                                                                                                                          |                                                                                    |
|-----------------------------------------------------------------------------------------------------------------------------------------------------------------------|--------------------------------------------------------------------------------------------------------------------------------------------------------------------------------------------------------------------------------------------------------------------------------------------------------------------------|------------------------------------------------------------------------------------|
|                                                                                                                                                                       | preferences depends on body mass status. European journal of clinical nutrition. 2017 Jun;71(6):736-42.                                                                                                                                                                                                                  |                                                                                    |
| Association of night eating habits with metabolic syndrome and its components: a longitudinal study                                                                   | Yoshida J, Eguchi E, Nagaoka K, Ito T, Ogino K. Association of night eating habits with metabolic syndrome and its components: a longitudinal study. BMC Public Health. 2018 Dec;18(1):1-2.                                                                                                                              | Wrong study design – cross sectional                                               |
| Timing of eating in adults across the weight spectrum: Metabolic factors and potential circadian mechanisms                                                           | Allison KC, Goel N. Timing of eating in adults across the weight spectrum: Metabolic factors and potential circadian mechanisms. Physiology & behavior. 2018 Aug 1;192:158-66.                                                                                                                                           | Wrong study design – cross sectional                                               |
| Pilot study of sleep and meal timing effects, independent of sleep duration and food intake, on insulin sensitivity in healthy individuals                            | Pizinger T, Kovtun K, RoyChoudhury A, Laferrère B, Shechter A, St-Onge MP. Pilot study of sleep and meal timing effects, independent of sleep duration and food intake, on insulin sensitivity in healthy individuals. Sleep health. 2018 Feb 1;4(1):33-9.                                                               | Wrong outcomes – anthropometry not measured                                        |
| The effect of meal frequency in a reduced-energy regimen on the gastrointestinal and appetite hormones in patients with type 2 diabetes: A randomised crossover study | Belinova L, Kahleova H, Malinska H, Topolcan O, Windrichova J, Oliyarnyk O, Kazdova L, Hill M, Pelikanova T. The effect of meal frequency in a reduced-energy regimen on the gastrointestinal and appetite hormones in patients with type 2 diabetes: A randomised crossover study. PLoS One. 2017 Apr 3;12(4):e0174820. | Wrong intervention – study alters meal frequency and not total energy distribution |
| Meal timing and obesity: Interactions with macronutrient intake and chronotype                                                                                        | Xiao Q, Garaulet M, Scheer FA. Meal timing and obesity: Interactions with macronutrient intake and chronotype. International journal of obesity. 2019 Sep;43(9):1701-11.                                                                                                                                                 | Wrong study design – cross sectional                                               |
| Meal patterns in relation to energy and protein intake in older adults in home health care                                                                            | Engelheart S, Brummer RJ, Forslund HB. Meal patterns in relation to energy and protein intake in older adults in home health care. Clinical nutrition ESPEN. 2020 Feb 1;35:180-7.                                                                                                                                        | Wrong study design – cross sectional                                               |
| Effect of dinner timing on nocturnal metabolism in healthy volunteers                                                                                                 | Gu C, Brereton N, Schweitzer A, Cotter M, Borsheim E, Wolfe RR, Jun JC. 0104 Effect of Dinner Timing on                                                                                                                                                                                                                  | Wrong outcomes – anthropometry not measured                                        |

|                                                                                                                                                                           |                                                                                                                                                                                                                                                                                                                                                                                       |                                                                                             |
|---------------------------------------------------------------------------------------------------------------------------------------------------------------------------|---------------------------------------------------------------------------------------------------------------------------------------------------------------------------------------------------------------------------------------------------------------------------------------------------------------------------------------------------------------------------------------|---------------------------------------------------------------------------------------------|
|                                                                                                                                                                           | Nocturnal Metabolism in Healthy Volunteers. Sleep. 2019 Apr 1;42:A43.                                                                                                                                                                                                                                                                                                                 |                                                                                             |
| Twice as High Diet-Induced Thermogenesis After Breakfast vs Dinner On High-Calorie as Well as Low-Calorie Meals                                                           | Richter J, Herzog N, Janka S, Baumann T, Kistenmacher A, Oltmanns KM. Twice as high diet-induced thermogenesis after breakfast vs dinner on high-calorie as well as low-calorie meals. The Journal of Clinical Endocrinology & Metabolism. 2020 Mar;105(3):e211-21.                                                                                                                   | Wrong outcomes – anthropometry not measured                                                 |
| Food intake and energy turnover - Time of day makes a difference                                                                                                          | Gohla G, Herzog N, Janka S, Baumann T, Martens JC, Kistenmacher A, Wardzinski EK, Oltmanns KM. Food intake and energy turnover-time of day makes a difference. InACTA PHYSIOLOGICA 2016 Mar 1 (Vol. 216). 111 RIVER ST, HOBOKEN 07030-5774, NJ USA: WILEY-BLACKWELL.                                                                                                                  | Wrong study outcomes – anthropometry not measured                                           |
| Impact of breakfast skipping compared with dinner skipping on regulation of energy balance and metabolic risk                                                             | Nas A, Mirza N, Hägele F, Kahlhöfer J, Keller J, Rising R, Kufer TA, Bosy-Westphal A. Impact of breakfast skipping compared with dinner skipping on regulation of energy balance and metabolic risk. The American journal of clinical nutrition. 2017 Jun 1;105(6):1351-61.                                                                                                           | Wrong study intervention – study duration not long enough to warrant meaningful weight loss |
| Three meals diet with high energy breakfast is an effective strategy for weight loss, reduction of glucose variability and of total daily insulin dose in type 2 diabetes | Jakubowicz D, Froy O, Tsameret S, Wainstein J, Raz I, Menaged M, Bar-Dayana Y, Mor N, Ganz T, Landau Z. Three meals diet with high energy breakfast is an effective strategy for weight loss, reduction of glucose variability and of total daily insulin dose in type 2 diabetes. InDIABETOLOGIA 2018 Oct 1 (Vol. 61, pp. S99-S99). 233 SPRING ST, NEW YORK, NY 10013 USA: SPRINGER. | Wrong intervention                                                                          |
| High energy breakfast diet is an effective strategy for weight loss and reduction of the total daily insulin dose in type 2 diabetes                                      | High energy breakfast diet is an effective strategy for weight loss and reduction of the total daily insulin dose in type 2 diabetes<br>Jakubowicz, D.; Froy, O.; Tsameret, S.; Wainstein, J.; Raz, I.; Menaged, M.; Bar-Dayana, Y.; Mor, N.; Ganz,                                                                                                                                   | Wrong intervention                                                                          |

|                                                                                                                            |                                                                                                                                                                                                                                                           |                                                         |
|----------------------------------------------------------------------------------------------------------------------------|-----------------------------------------------------------------------------------------------------------------------------------------------------------------------------------------------------------------------------------------------------------|---------------------------------------------------------|
|                                                                                                                            | T.; Landau, Z. Endocrine Reviews. Conference: 100th Annual Meeting of the Endocrine Society, ENDO 2018;39(2 Supplement 1):2018                                                                                                                            |                                                         |
| The causal role of breakfast in energy balance and health: A randomized controlled trial in obese adults                   | Chowdhury EA, Richardson JD, Holman GD, Tsintzas K, Thompson D, Betts JA. The causal role of breakfast in energy balance and health: a randomized controlled trial in obese adults. The American journal of clinical nutrition. 2016 Mar 1;103(3):747-56. | Wrong intervention – study included a period of fasting |
| Six Weeks of Morning Fasting Causes Little Adaptation of Metabolic or Appetite Responses to Feeding in Adults with Obesity | Chowdhury EA, Richardson JD, Gonzalez JT, Tsintzas K, Thompson D, Betts JA. Six weeks of morning fasting causes little adaptation of metabolic or appetite responses to feeding in adults with obesity. Obesity. 2019 May;27(5):813-21.                   | Wrong intervention - study included a period of fasting |
| The causal role of breakfast in energy balance and health: a randomized controlled trial in lean adults                    | Betts JA, Richardson JD, Chowdhury EA, Holman GD, Tsintzas K, Thompson D. The causal role of breakfast in energy balance and health: a randomized controlled trial in lean adults. The American journal of clinical nutrition. 2014 Aug 1;100(2):539-47.  | Wrong intervention - study included a period of fasting |
| Eating occasions, obesity and related behaviors in working adults: Does it matter when you snack?                          | Barrington WE, Beresford SA. Eating occasions, obesity and related behaviors in working adults: does it matter when you snack?. Nutrients. 2019 Oct 1;11(10):2320.                                                                                        | Wrong study design – cross sectional                    |
| An Earlier First Meal Timing Associate with Weight Loss Effectiveness in A 12-Week Weight Loss Support Program             | Hatanaka M, Hatamoto Y, Tajiri E, Matsumoto N, Tanaka S, Yoshimura E. An Earlier First Meal Timing Associates with Weight Loss Effectiveness in A 12-Week Weight Loss Support Program. Nutrients. 2022 Jan 7;14(2):249.                                   | Wrong intervention - study included a period of fasting |
| Personalized weight loss strategies—the role of macronutrient distribution                                                 | Martinez JA, Navas-Carretero S, Saris WH, Astrup A. Personalized weight loss strategies—the role of macronutrient distribution. Nature Reviews Endocrinology. 2014 Dec;10(12):749-60.                                                                     | Wrong study design – review                             |

|                                                                                                                              |                                                                                                                                                                                                                                           |                                                                                             |
|------------------------------------------------------------------------------------------------------------------------------|-------------------------------------------------------------------------------------------------------------------------------------------------------------------------------------------------------------------------------------------|---------------------------------------------------------------------------------------------|
| Timing of food intake predicts weight loss effectiveness                                                                     | Garaulet M, Gómez-Abellán P, Albuquerque-Béjar JJ, Lee YC, Ordovás JM, Scheer FA. Timing of food intake predicts weight loss effectiveness. International journal of obesity. 2013 Apr;37(4):604-11.                                      | Wrong study design – cross sectional                                                        |
| Circadian rhythms and meal timing: impact on energy balance and body weight                                                  | Boege HL, Bhatti MZ, St-Onge MP. Circadian rhythms and meal timing: impact on energy balance and body weight. Current Opinion in Biotechnology. 2021 Aug 1;70:1-6.                                                                        | Wrong study design – review                                                                 |
| Timing of food intake and obesity: A novel association                                                                       | Garaulet M, Gómez-Abellán P. Timing of food intake and obesity: a novel association. Physiology & behavior. 2014 Jul 1;134:44-50.                                                                                                         | Wrong study design – cross sectional                                                        |
| Delayed Timing of Eating: Impact on Weight and Metabolism                                                                    | Allison KC, Goel N, Ahima RS. Delayed timing of eating: impact on weight and metabolism. Current obesity reports. 2014 Mar;3(1):91-100.                                                                                                   | Wrong study design – review                                                                 |
| Meal timing influences daily caloric intake in healthy adults                                                                | Reid KJ, Baron KG, Zee PC. Meal timing influences daily caloric intake in healthy adults. Nutrition research. 2014 Nov 1;34(11):930-5.                                                                                                    | Wrong outcomes – weight loss not measured                                                   |
| Chronobiological Aspects of Weight Loss in Obesity: Effects of Different Meal Timing Regimens                                | Sensi S, Capani F. Chronobiological aspects of weight loss in obesity: effects of different meal timing regimens. Chronobiology international. 1987 Jan 1;4(2):251-61.                                                                    | Wrong study intervention – study duration not long enough to warrant meaningful weight loss |
| Irregularity in breakfast consumption and daily meal timing patterns in association with body weight status and inflammation | Guintier MA, Campbell PT, Patel AV, McCullough ML. Irregularity in breakfast consumption and daily meal timing patterns in association with body weight status and inflammation. British Journal of Nutrition. 2019 Nov;122(10):1192-200. | Wrong study design – cross sectional                                                        |



| Paper                                                                                                                                                                                 | Jakubowitz 2012 | Jakubowitz 2013 | Keim 1997 | Lombardo 2014 | Madjd 2016 | Rabinovitz 2014 | Raynor 2018 | Versteeg 2017 | Versteeg 2018 | Madjd 2020 |
|---------------------------------------------------------------------------------------------------------------------------------------------------------------------------------------|-----------------|-----------------|-----------|---------------|------------|-----------------|-------------|---------------|---------------|------------|
| Was true randomisation used for assignment of participants to this treatment? (yes, no, unclear)                                                                                      | Orange          | Green           | Red       | Orange        | Green      | Green           | Green       | Orange        | Orange        | Green      |
| Was allocation to treatment groups concealed?                                                                                                                                         | Orange          | Orange          | Orange    | Orange        | Green      | Green           | Orange      | Orange        | Orange        | Green      |
| Were treatment groups similar at baseline?                                                                                                                                            | Green           | Green           | Green     | Green         | Green      | Green           | Green       | Green         | Green         | Green      |
| Were participants blind to treatment assignment?                                                                                                                                      | Red             | Red             | Red       | Red           | Red        | Red             | Red         | Red           | Red           | Green      |
| Were those delivering treatment blind to treatment assignment?                                                                                                                        | Red             | Red             | Red       | Red           | Red        | Red             | Red         | Red           | Red           | Red        |
| Were outcome assessors blind to treatment assignment?                                                                                                                                 | Orange          | Orange          | Orange    | Orange        | Orange     | Orange          | Green       | Orange        | Orange        | Orange     |
| Were treatment groups treated identically other than the intervention of interest?                                                                                                    | Green           | Green           | Green     | Green         | Green      | Green           | Green       | Green         | Green         | Green      |
| Was follow up complete and if not, were differences in between groups in terms of their follow up adequately described and analysed?                                                  | Green           | Red             | Red       | Red           | Red        | Green           | Green       | Green         | Green         | Green      |
| Were participants analysed in the groups to which they were randomised?                                                                                                               | Green           | Orange          | Orange    | Orange        | Green      | Green           | Orange      | Orange        | Orange        | Green      |
| Were outcomes measured in the same way for treatment groups?                                                                                                                          | Green           | Green           | Green     | Green         | Green      | Green           | Green       | Green         | Green         | Green      |
| Were outcomes measured in a reliable way?                                                                                                                                             | Orange          | Orange          | Orange    | Orange        | Orange     | Orange          | Orange      | Orange        | Orange        | Orange     |
| Was appropriate statistical analysis used?                                                                                                                                            | Orange          | Orange          | Red       | Red           | Green      | Red             | Red         | Orange        | Green         | Green      |
| Was the trial design appropriate, and any deviations from the standard RCT design (individual randomization, parallel groups) accounted for in the conduct and analysis of the trial? | Green           | Green           | Red       | Green         | Green      | Green           | Green       | Green         | Green         | Green      |
| Overall appraisal                                                                                                                                                                     | Moderate        | Moderate        | Weak      | Weak          | Moderate   | Moderate        | Moderate    | Weak          | Moderate      | Moderate   |

Appendix 2: Critical appraisal of included studies using Joanna Briggs Institute Checklist for Randomised Controlled Trials. Green=yes; Red=no; Orange=unclear

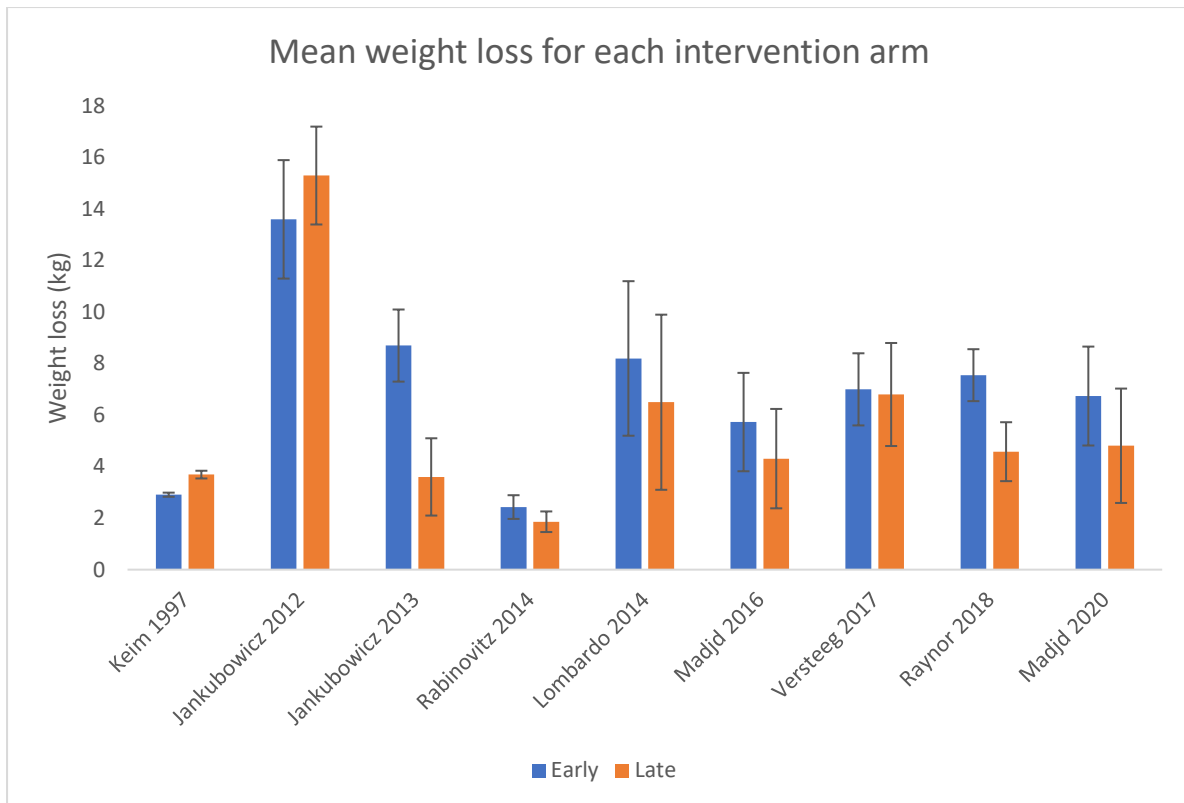

Mean (SD) weight loss (kg) for each intervention arm per study

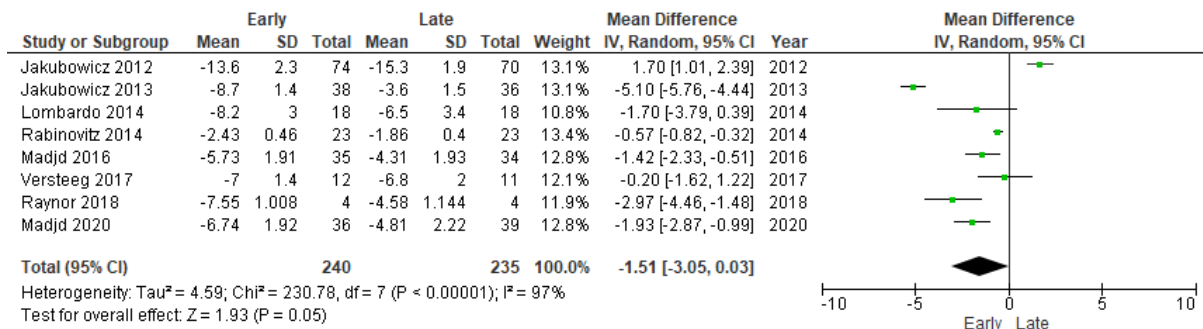

Forest plot for meta-analysis of trials reporting weight loss (kg) for earlier versus later eating patterns (excluding Keim 1997)

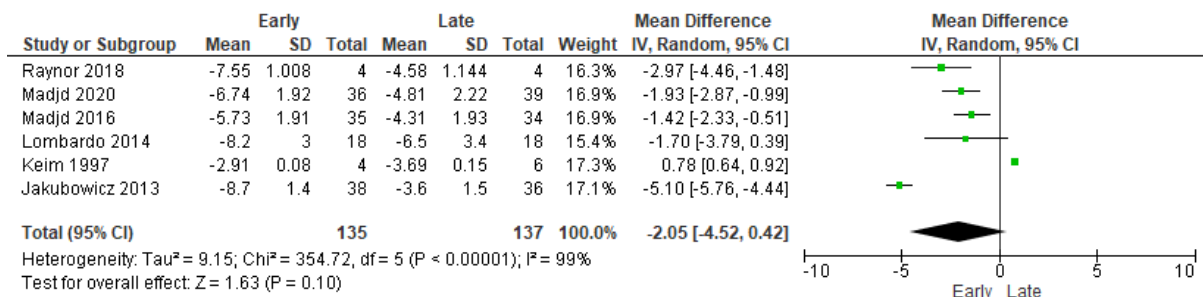

Forest plot for sub-analysis of studies reporting weight loss (kg) for earlier versus later eating patterns (studies reporting female participants only)

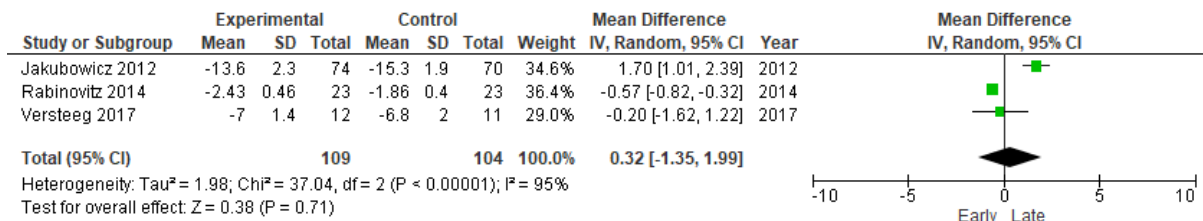

Forest plot for sub-analysis of studies reporting weight loss (kg) for earlier versus later eating patterns (studies reporting male participants with or without females)

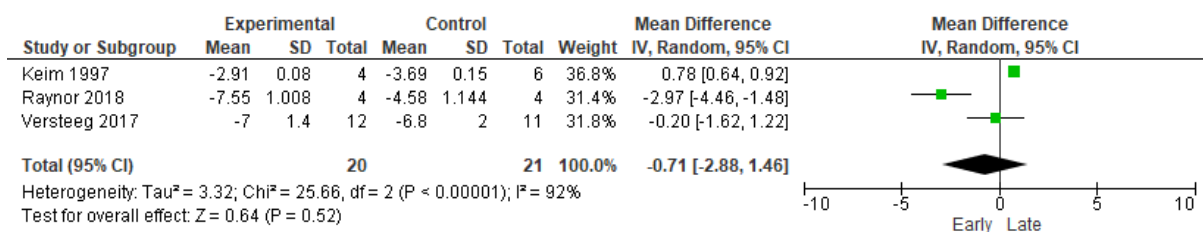

Forest plot for sub-analysis of studies reporting weight loss (kg) for earlier versus later eating patterns (study intervention duration <12weeks)

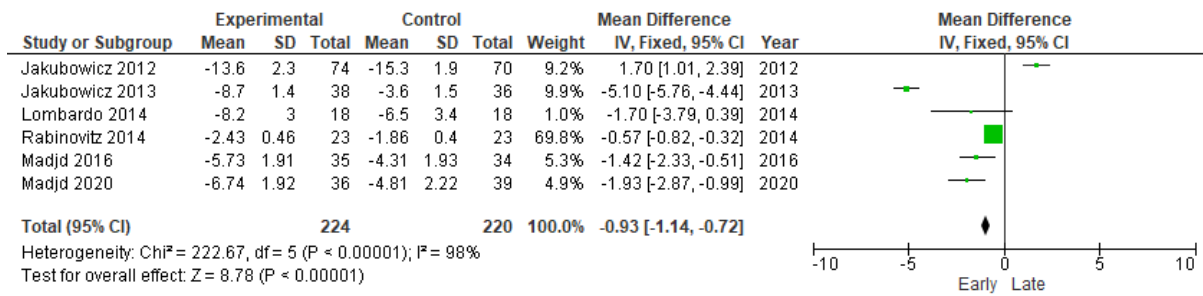

Forest plot for sub-analysis of studies reporting weight loss (kg) for earlier versus later eating patterns (study intervention duration  $\geq 12$  weeks)

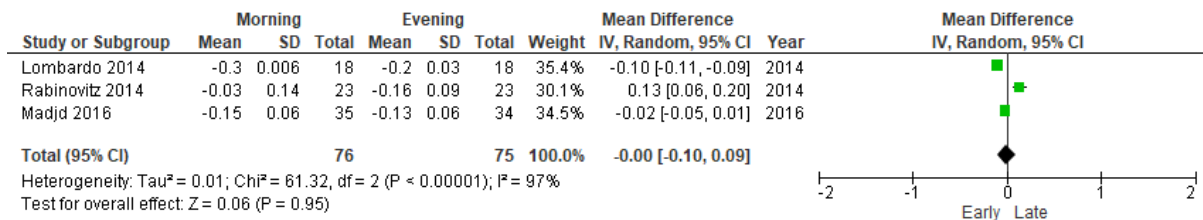

Forest plot of meta-analysis for change in fasting triglycerides

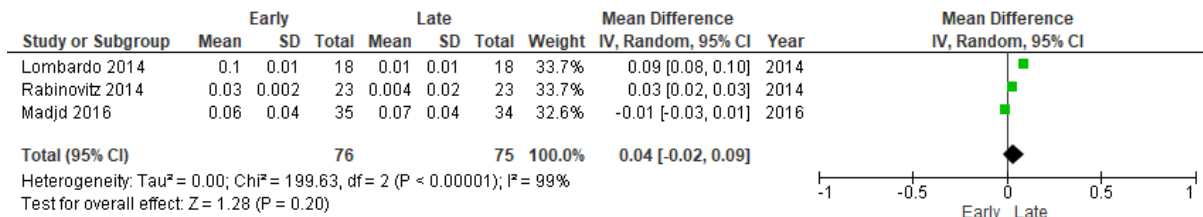

Forest plot of meta-analysis for change in fasting serum HDL cholesterol

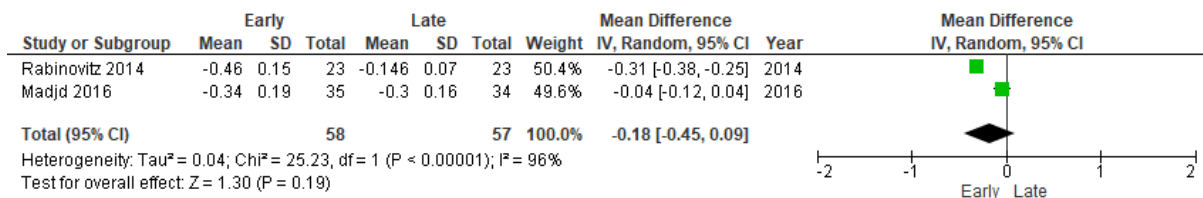

Forest plot of meta-analysis for change in HbA1c
